# Supplementary material for: Species diversity patterns in Tagetes minuta-invaded plant communities along an elevational gradient in Southeastern Xizang
Source: PeerJ. 2026 Jan 8;14:e20573. doi: 10.7717/peerj.20573 (PMC12790783; doi:10.7717/peerj.20573)
Supplement: Supplemental Information 1 [file peerj-14-20573-s001.xlsx]

## Sheet: peerj-120668-Original_species_d
site	species	abun	Cover%	hight	habitat type
1	Tagetes minuta	128	30	23.2cm	along national highways near residential areas（GJ）
1	Erodium cicutarium	4			along national highways near residential areas（GJ）
1	Eragrostis nigra	3			along national highways near residential areas（GJ）
1	Ajania myriantha	5			along national highways near residential areas（GJ）
1	Cynoglossum amabile	18			along national highways near residential areas（GJ）
1	Synotis solidaginea	2			along national highways near residential areas（GJ）
1	Astragalus strictus	20			along national highways near residential areas（GJ）
2	Oxalis corniculata	2			along national highways near residential areas（GJ）
2	Poa annua	10			along national highways near residential areas（GJ）
2	Tagetes minuta	58	50	39.15cm	along national highways near residential areas（GJ）
2	Lagopsis supina	5			along national highways near residential areas（GJ）
2	Taraxacum sikkimense	3			along national highways near residential areas（GJ）
2	Pseudognaphalium affine	4			along national highways near residential areas（GJ）
2	Erodium cicutarium	7			along national highways near residential areas（GJ）
2	Plantago depressa	5			along national highways near residential areas（GJ）
2	Rosa sericea	2			along national highways near residential areas（GJ）
2	Clinopodium polycephalum	2			along national highways near residential areas（GJ）
2	Cynoglossum amabile	5			along national highways near residential areas（GJ）
2	Synotis solidaginea	5			along national highways near residential areas（GJ）
2	Melilotus suaveolens	2			along national highways near residential areas（GJ）
2	Astragalus strictus	5			along national highways near residential areas（GJ）
3	Malva pusilla	2			along national highways near residential areas（GJ）
3	Tagetes minuta	172	50	55.633cm	along national highways near residential areas（GJ）
3	Sambucus adnata	1			along national highways near residential areas（GJ）
3	Erigeron bonariensis	1			along national highways near residential areas（GJ）
3	Taraxacum sikkimense	2			along national highways near residential areas（GJ）
3	Medicago lupulina	2			along national highways near residential areas（GJ）
3	Mazus celsioides	2			along national highways near residential areas（GJ）
3	Galinsoga parviflora	7			along national highways near residential areas（GJ）
3	Trigonotis microcarpa	5			along national highways near residential areas（GJ）
3	Synotis solidaginea	5	10		along national highways near residential areas（GJ）
3	Astragalus strictus	11	2		along national highways near residential areas（GJ）
4	Poa annua	30			next to abandoned buildings (FJ)
4	Tagetes minuta	268	50	14.033cm	next to abandoned buildings (FJ)
4	Medicago lupulina	5			next to abandoned buildings (FJ)
4	Erodium cicutarium	9			next to abandoned buildings (FJ)
4	Plantago depressa	3			next to abandoned buildings (FJ)
4	Senecio vulgaris	2			next to abandoned buildings (FJ)
4	Sonchus oleraceus	4			next to abandoned buildings (FJ)
4	Eragrostis nigra	5			next to abandoned buildings (FJ)
4	Cynoglossum amabile	2			next to abandoned buildings (FJ)
5	Oxalis corniculata	3			next to abandoned buildings (FJ)
5	Poa annua	10			next to abandoned buildings (FJ)
5	Tagetes minuta	86	60	41cm	next to abandoned buildings (FJ)
5	Erigeron bonariensis	3			next to abandoned buildings (FJ)
5	Taraxacum sikkimense	3			next to abandoned buildings (FJ)
5	Equisetum arvense	10			next to abandoned buildings (FJ)
5	Medicago lupulina	5			next to abandoned buildings (FJ)
5	Erodium cicutarium	5			next to abandoned buildings (FJ)
5	Carduus acanthoides	3			next to abandoned buildings (FJ)
5	Euphorbia humifusa	10			next to abandoned buildings (FJ)
5	Cynoglossum amabile	5			next to abandoned buildings (FJ)
5	Potentilla supina	2			next to abandoned buildings (FJ)
6	Poa annua	38			next to abandoned buildings (FJ)
6	Malva pusilla	2			next to abandoned buildings (FJ)
6	Tagetes minuta	152	65	29.333cm	next to abandoned buildings (FJ)
6	Medicago lupulina	2			next to abandoned buildings (FJ)
6	Digitaria cruciata	7			next to abandoned buildings (FJ)
6	Erodium cicutarium	15			next to abandoned buildings (FJ)
6	Sonchus oleraceus	3			next to abandoned buildings (FJ)
6	Euphorbia humifusa	5			next to abandoned buildings (FJ)
6	Cynoglossum amabile	6			next to abandoned buildings (FJ)
7	Poa annua	30			riverbank sandy areas (HB)
7	Malva pusilla	1			riverbank sandy areas (HB)
7	Tagetes minuta	129	40	24.5cm	riverbank sandy areas (HB)
7	Artemisia stechmanniana	1			riverbank sandy areas (HB)
7	Medicago lupulina	3			riverbank sandy areas (HB)
7	Erodium cicutarium	11			riverbank sandy areas (HB)
7	Plantago depressa	5			riverbank sandy areas (HB)
7	Piptanthus nepalensis	1			riverbank sandy areas (HB)
7	Eragrostis nigra	28			riverbank sandy areas (HB)
7	Cynoglossum amabile	13			riverbank sandy areas (HB)
7	Astragalus strictus	6			riverbank sandy areas (HB)
8	Malva pusilla	5			riverbank sandy areas (HB)
8	Viola forrestiana	15			riverbank sandy areas (HB)
8	Tagetes minuta	116	70	36.9cm	riverbank sandy areas (HB)
8	Medicago lupulina	2			riverbank sandy areas (HB)
8	Erodium cicutarium	19			riverbank sandy areas (HB)
8	Galinsoga parviflora	2			riverbank sandy areas (HB)
8	Arctium lappa	1			riverbank sandy areas (HB)
8	Cynoglossum amabile	8			riverbank sandy areas (HB)
8	Astragalus strictus	5			riverbank sandy areas (HB)
9	Poa annua	20			riverbank sandy areas (HB)
9	Tagetes minuta	134	62	26.267cm	riverbank sandy areas (HB)
9	Taraxacum sikkimense	2			riverbank sandy areas (HB)
9	Digitaria cruciata	3			riverbank sandy areas (HB)
9	Erodium cicutarium	25			riverbank sandy areas (HB)
9	Dysphania schraderiana	3			riverbank sandy areas (HB)
9	Eragrostis nigra	10			riverbank sandy areas (HB)
9	Setaria viridis	10			riverbank sandy areas (HB)
9	Cynoglossum amabile	5			riverbank sandy areas (HB)
9	Astragalus strictus	2			riverbank sandy areas (HB)
10	Tagetes minuta	184	70	59.467cm	artificial tree pits (soil pits dug for planting street trees) along national highways (GH)
10	Cotoneaster microphyllus	1			artificial tree pits (soil pits dug for planting street trees) along national highways (GH)
10	Artemisia stechmanniana	2			artificial tree pits (soil pits dug for planting street trees) along national highways (GH)
10	Taraxacum sikkimense	1			artificial tree pits (soil pits dug for planting street trees) along national highways (GH)
10	Medicago lupulina	10			artificial tree pits (soil pits dug for planting street trees) along national highways (GH)
10	Astragalus membranaceus	1			artificial tree pits (soil pits dug for planting street trees) along national highways (GH)
10	Eragrostis nigra	15			artificial tree pits (soil pits dug for planting street trees) along national highways (GH)
10	Cynoglossum amabile	5			artificial tree pits (soil pits dug for planting street trees) along national highways (GH)
11	Tagetes minuta	78	38	56.25cm	garbage dump locations (LJ)
11	Erigeron canadensis	12			garbage dump locations (LJ)
11	Artemisia stechmanniana	10			garbage dump locations (LJ)
11	Taraxacum sikkimense	2			garbage dump locations (LJ)
11	Pseudognaphalium affine	3			garbage dump locations (LJ)
11	Solanum americanum	1			garbage dump locations (LJ)
11	Sophora moorcroftiana	2			garbage dump locations (LJ)
11	Erodium cicutarium	1			garbage dump locations (LJ)
11	Plantago depressa	5			garbage dump locations (LJ)
11	Verbascum thapsus	6			garbage dump locations (LJ)
11	Eragrostis nigra	10			garbage dump locations (LJ)
11	Ajania myriantha	10			garbage dump locations (LJ)
11	Aster altaicus	2			garbage dump locations (LJ)
12	Poa annua	10			along national highways near residential areas（GJ）
12	Malva pusilla	3			along national highways near residential areas（GJ）
12	Tagetes minuta	105	35	31.867cm	along national highways near residential areas（GJ）
12	Taraxacum sikkimense	5			along national highways near residential areas（GJ）
12	Pseudognaphalium affine	6			along national highways near residential areas（GJ）
12	Plantago depressa	20			along national highways near residential areas（GJ）
12	Rumex nepalensis	16			along national highways near residential areas（GJ）
12	Verbascum thapsus	6			along national highways near residential areas（GJ）
12	Setaria viridis	10			along national highways near residential areas（GJ）
12	Ajania myriantha	15			along national highways near residential areas（GJ）
12	Polygonum aviculare	21			along national highways near residential areas（GJ）
13	Poa annua	10			along national highways near residential areas（GJ）
13	Tagetes minuta	226	30	24.317cm	along national highways near residential areas（GJ）
13	Erigeron canadensis	5			along national highways near residential areas（GJ）
13	Taraxacum sikkimense	6			along national highways near residential areas（GJ）
13	Erodium cicutarium	3			along national highways near residential areas（GJ）
13	Plantago depressa	15			along national highways near residential areas（GJ）
13	Galinsoga parviflora	3			along national highways near residential areas（GJ）
13	Rumex nepalensis	2			along national highways near residential areas（GJ）
13	Sonchus oleraceus	3			along national highways near residential areas（GJ）
13	Capsella bursa-pastoris	5			along national highways near residential areas（GJ）
13	Eragrostis nigra	10			along national highways near residential areas（GJ）
13	Ajania myriantha	2			along national highways near residential areas（GJ）
13	Artemisia sieversiana	2			along national highways near residential areas（GJ）
13	Synotis solidaginea	2			along national highways near residential areas（GJ）
14	Poa annua	40			along national highways near residential areas（GJ）
14	Malva pusilla	5			along national highways near residential areas（GJ）
14	Tagetes minuta	82	55	34.633cm	along national highways near residential areas（GJ）
14	Artemisia stechmanniana	5			along national highways near residential areas（GJ）
14	Taraxacum sikkimense	5			along national highways near residential areas（GJ）
14	Pseudognaphalium affine	2			along national highways near residential areas（GJ）
14	Digitaria cruciata	16			along national highways near residential areas（GJ）
14	Solanum americanum	5			along national highways near residential areas（GJ）
14	Plantago depressa	32			along national highways near residential areas（GJ）
14	Galinsoga parviflora	2			along national highways near residential areas（GJ）
14	Rumex nepalensis	2			along national highways near residential areas（GJ）
14	Capsella bursa-pastoris	2			along national highways near residential areas（GJ）
14	Eragrostis nigra	12			along national highways near residential areas（GJ）
14	Melilotus suaveolens	1			along national highways near residential areas（GJ）
15	Viola forrestiana	1			drainage ditches along national highways (GP)
15	Tagetes minuta	166	43	28.35cm	drainage ditches along national highways (GP)
15	Erigeron canadensis	12			drainage ditches along national highways (GP)
15	Artemisia stechmanniana	3			drainage ditches along national highways (GP)
15	Taraxacum sikkimense	4			drainage ditches along national highways (GP)
15	Digitaria cruciata	10			drainage ditches along national highways (GP)
15	Erodium cicutarium	2			drainage ditches along national highways (GP)
15	Rubia cordifolia	1			drainage ditches along national highways (GP)
15	Plantago depressa	15			drainage ditches along national highways (GP)
15	Galinsoga parviflora	3			drainage ditches along national highways (GP)
15	Verbascum thapsus	14			drainage ditches along national highways (GP)
15	Epilobium sikkimense	4			drainage ditches along national highways (GP)
15	Eragrostis nigra	20			drainage ditches along national highways (GP)
15	Ajania myriantha	4			drainage ditches along national highways (GP)
15	Clinopodium polycephalum	3			drainage ditches along national highways (GP)
15	Aster altaicus	2			drainage ditches along national highways (GP)
16	Viola forrestiana	3			artificial tree pits (soil pits dug for planting street trees) along national highways (GH)
16	Tagetes minuta	144	60	37.467cm	artificial tree pits (soil pits dug for planting street trees) along national highways (GH)
16	Artemisia stechmanniana	3			artificial tree pits (soil pits dug for planting street trees) along national highways (GH)
16	Taraxacum sikkimense	2			artificial tree pits (soil pits dug for planting street trees) along national highways (GH)
16	Digitaria cruciata	50			artificial tree pits (soil pits dug for planting street trees) along national highways (GH)
16	Erodium cicutarium	2			artificial tree pits (soil pits dug for planting street trees) along national highways (GH)
16	Plantago depressa	48			artificial tree pits (soil pits dug for planting street trees) along national highways (GH)
16	Verbascum thapsus	1			artificial tree pits (soil pits dug for planting street trees) along national highways (GH)
16	Capsella bursa-pastoris	2			artificial tree pits (soil pits dug for planting street trees) along national highways (GH)
16	Eragrostis nigra	30			artificial tree pits (soil pits dug for planting street trees) along national highways (GH)
16	Clinopodium polycephalum	2			artificial tree pits (soil pits dug for planting street trees) along national highways (GH)
16	Cynoglossum amabile	2			artificial tree pits (soil pits dug for planting street trees) along national highways (GH)
16	Synotis solidaginea	5			artificial tree pits (soil pits dug for planting street trees) along national highways (GH)
17	Poa annua	80			artificial tree pits (soil pits dug for planting street trees) along national highways (GH)
17	Viola forrestiana	4			artificial tree pits (soil pits dug for planting street trees) along national highways (GH)
17	Tagetes minuta	137	46	26.017cm	artificial tree pits (soil pits dug for planting street trees) along national highways (GH)
17	Erigeron canadensis	5			artificial tree pits (soil pits dug for planting street trees) along national highways (GH)
17	Artemisia stechmanniana	3			artificial tree pits (soil pits dug for planting street trees) along national highways (GH)
17	Taraxacum sikkimense	3			artificial tree pits (soil pits dug for planting street trees) along national highways (GH)
17	Digitaria cruciata	48			artificial tree pits (soil pits dug for planting street trees) along national highways (GH)
17	Plantago depressa	33			artificial tree pits (soil pits dug for planting street trees) along national highways (GH)
17	Rumex nepalensis	1			artificial tree pits (soil pits dug for planting street trees) along national highways (GH)
17	Verbascum thapsus	2			artificial tree pits (soil pits dug for planting street trees) along national highways (GH)
17	Capsella bursa-pastoris	3			artificial tree pits (soil pits dug for planting street trees) along national highways (GH)
17	Ajania myriantha	2			artificial tree pits (soil pits dug for planting street trees) along national highways (GH)
17	Potentilla saundersiana	2			artificial tree pits (soil pits dug for planting street trees) along national highways (GH)
17	Persicaria glacialis	4			artificial tree pits (soil pits dug for planting street trees) along national highways (GH)
18	Tagetes minuta	111	20	24.633cm	drainage ditches along national highways (GP)
18	Campanula pallida	2			drainage ditches along national highways (GP)
18	Medicago lupulina	18			drainage ditches along national highways (GP)
18	Pseudognaphalium affine	4			drainage ditches along national highways (GP)
18	Digitaria cruciata	5			drainage ditches along national highways (GP)
18	Plantago depressa	40			drainage ditches along national highways (GP)
18	Leibnitzia nepalensis	1			drainage ditches along national highways (GP)
18	Gentiana squarrosa Ledeb	18			drainage ditches along national highways (GP)
18	Eragrostis nigra	30			drainage ditches along national highways (GP)
18	Setaria viridis	5			drainage ditches along national highways (GP)
18	Potentilla saundersiana	1			drainage ditches along national highways (GP)
18	Aster altaicus	3			drainage ditches along national highways (GP)
19	Cotoneaster multiflorus var. atropurpureus	1			artificial tree pits (soil pits dug for planting street trees) along national highways (GH)
19	Carex nubigena	3			artificial tree pits (soil pits dug for planting street trees) along national highways (GH)
19	Tagetes minuta	78	20	23.2cm	artificial tree pits (soil pits dug for planting street trees) along national highways (GH)
19	Spiraea canescens	1			artificial tree pits (soil pits dug for planting street trees) along national highways (GH)
19	Jasminum officinale	4			artificial tree pits (soil pits dug for planting street trees) along national highways (GH)
19	Pseudognaphalium affine	2			artificial tree pits (soil pits dug for planting street trees) along national highways (GH)
19	Drynaria baronii	34			artificial tree pits (soil pits dug for planting street trees) along national highways (GH)
19	Rubia cordifolia	3			artificial tree pits (soil pits dug for planting street trees) along national highways (GH)
19	Prunus mira	2			artificial tree pits (soil pits dug for planting street trees) along national highways (GH)
19	Leptodermis forrestii	2			artificial tree pits (soil pits dug for planting street trees) along national highways (GH)
19	Rubus biflorus	1			artificial tree pits (soil pits dug for planting street trees) along national highways (GH)
19	Clinopodium polycephalum	2			artificial tree pits (soil pits dug for planting street trees) along national highways (GH)
19	Cynoglossum amabile	1			artificial tree pits (soil pits dug for planting street trees) along national highways (GH)
20	Clematis tibetana	1	80		drainage ditches along national highways (GP)
20	Poa annua	10			drainage ditches along national highways (GP)
20	Malva pusilla	3			drainage ditches along national highways (GP)
20	Tagetes minuta	115	30	41.167cm	drainage ditches along national highways (GP)
20	Artemisia demissa	4			drainage ditches along national highways (GP)
20	Artemisia stechmanniana	3			drainage ditches along national highways (GP)
20	Plantago depressa	2			drainage ditches along national highways (GP)
20	Eragrostis nigra	15			drainage ditches along national highways (GP)
20	Ajania myriantha	7			drainage ditches along national highways (GP)
20	Artemisia sieversiana	5			drainage ditches along national highways (GP)
20	Astragalus strictus	3			drainage ditches along national highways (GP)
21	Caragana franchetiana	1			along national highways near residential areas（GJ）
21	Malva pusilla	3			along national highways near residential areas（GJ）
21	Tagetes minuta	88	58	65.167cm	along national highways near residential areas（GJ）
21	Artemisia stechmanniana	5			along national highways near residential areas（GJ）
21	Erodium cicutarium	3			along national highways near residential areas（GJ）
21	Plantago depressa	10			along national highways near residential areas（GJ）
21	Galinsoga parviflora	4			along national highways near residential areas（GJ）
21	Rumex nepalensis	5			along national highways near residential areas（GJ）
21	Lepidium apetalum	2			along national highways near residential areas（GJ）
21	Cynoglossum amabile	5			along national highways near residential areas（GJ）
21	Artemisia sieversiana	40			along national highways near residential areas（GJ）
22	Poa annua	20			along national highways near residential areas（GJ）
22	Tagetes minuta	129	70	55.1cm	along national highways near residential areas（GJ）
22	Digitaria cruciata	5			along national highways near residential areas（GJ）
22	Mazus celsioides	2			along national highways near residential areas（GJ）
22	Erodium cicutarium	1			along national highways near residential areas（GJ）
22	Plantago depressa	5			along national highways near residential areas（GJ）
22	Galinsoga parviflora	4			along national highways near residential areas（GJ）
22	Elsholtzia densa	3			along national highways near residential areas（GJ）
22	Lepidium apetalum	2			along national highways near residential areas（GJ）
22	Artemisia sieversiana	10			along national highways near residential areas（GJ）
23	Viola forrestiana	5			along national highways near residential areas（GJ）
23	Tagetes minuta	150	65	120.07cm	along national highways near residential areas（GJ）
23	Solanum americanum	2			along national highways near residential areas（GJ）
23	Plantago depressa	10			along national highways near residential areas（GJ）
23	Galinsoga parviflora	5			along national highways near residential areas（GJ）
23	Rumex nepalensis	5			along national highways near residential areas（GJ）
23	Calamagrostis pseudophragmites	1			along national highways near residential areas（GJ）
23	Buddleja alternifolia	3			along national highways near residential areas（GJ）
23	Cynoglossum amabile	1			along national highways near residential areas（GJ）
23	Artemisia sieversiana	5			along national highways near residential areas（GJ）
23	Astragalus strictus	4			along national highways near residential areas（GJ）
24	Tagetes minuta	89	40	40.917cm	construction sites (JZ)
24	Erigeron canadensis	3			construction sites (JZ)
24	Artemisia stechmanniana	5			construction sites (JZ)
24	Datura stramonium	1			construction sites (JZ)
24	Dysphania schraderiana	4			construction sites (JZ)
24	Eragrostis nigra	30			construction sites (JZ)
24	Artemisia sieversiana	3			construction sites (JZ)
24	Echinochloa crus-galli	3			construction sites (JZ)
24	Pennisetum flaccidum	33			construction sites (JZ)
25	Tagetes minuta	128	35	62.267cm	construction sites (JZ)
25	Erigeron canadensis	20			construction sites (JZ)
25	Artemisia stechmanniana	15			construction sites (JZ)
25	Datura stramonium	3			construction sites (JZ)
25	Dysphania schraderiana	10			construction sites (JZ)
25	Eragrostis nigra	48			construction sites (JZ)
25	Buddleja alternifolia	2			construction sites (JZ)
25	Chloris virgata	10			construction sites (JZ)
26	Malva pusilla	2			construction sites (JZ)
26	Tagetes minuta	153	62	33.167cm	construction sites (JZ)
26	Artemisia stechmanniana	3			construction sites (JZ)
26	Digitaria cruciata	20			construction sites (JZ)
26	Solanum americanum	3			construction sites (JZ)
26	Datura stramonium	2			construction sites (JZ)
26	Eragrostis nigra	10			construction sites (JZ)
26	Buddleja alternifolia	3			construction sites (JZ)
26	Echinochloa crus-galli	15			construction sites (JZ)
27	Malva pusilla	3			garbage dump locations (LJ)
27	Tagetes minuta	277	85	110.77cm	garbage dump locations (LJ)
27	Medicago lupulina	5			garbage dump locations (LJ)
27	Taraxacum scariosum	10			garbage dump locations (LJ)
27	Datura stramonium	6			garbage dump locations (LJ)
27	Carduus acanthoides	3			garbage dump locations (LJ)
27	Cynoglossum amabile	5			garbage dump locations (LJ)
27	Artemisia sieversiana	4			garbage dump locations (LJ)
27	Melilotus suaveolens	10			garbage dump locations (LJ)
28	Tagetes minuta	160	60	82.033cm	garbage dump locations (LJ)
28	Artemisia stechmanniana	2			garbage dump locations (LJ)
28	Taraxacum scariosum	5			garbage dump locations (LJ)
28	Plantago depressa	5			garbage dump locations (LJ)
28	Galinsoga parviflora	5			garbage dump locations (LJ)
28	Eragrostis nigra	10			garbage dump locations (LJ)
28	Lolium perenne	20			garbage dump locations (LJ)
28	Cynoglossum amabile	2			garbage dump locations (LJ)
28	Astragalus strictus	5			garbage dump locations (LJ)
29	Malva pusilla	3			garbage dump locations (LJ)
29	Tagetes minuta	197	70	77.393cm	garbage dump locations (LJ)
29	Erigeron canadensis	5			garbage dump locations (LJ)
29	Plantago depressa	10			garbage dump locations (LJ)
29	Senecio vulgaris	1			garbage dump locations (LJ)
29	Verbascum thapsus	6			garbage dump locations (LJ)
29	Datura stramonium	2			garbage dump locations (LJ)
29	Cynoglossum amabile	5			garbage dump locations (LJ)
29	Melilotus suaveolens	10			garbage dump locations (LJ)
30	Tagetes minuta	187	87	88.233cm	garbage dump locations (LJ)
30	Artemisia stechmanniana	2			garbage dump locations (LJ)
30	Taraxacum scariosum	5			garbage dump locations (LJ)
30	Solanum americanum	3			garbage dump locations (LJ)
30	Plantago depressa	5			garbage dump locations (LJ)
30	Galinsoga parviflora	5			garbage dump locations (LJ)
30	Datura stramonium	2			garbage dump locations (LJ)
30	Eragrostis nigra	10			garbage dump locations (LJ)
30	Artemisia sieversiana	4			garbage dump locations (LJ)
31	Tagetes minuta	63	25	54.133cm	drainage ditches along national highways (GP)
31	Erigeron canadensis	3			drainage ditches along national highways (GP)
31	Sophora moorcroftiana	10			drainage ditches along national highways (GP)
31	Plantago depressa	5			drainage ditches along national highways (GP)
31	Sonchus oleraceus	5			drainage ditches along national highways (GP)
31	Dysphania schraderiana	10			drainage ditches along national highways (GP)
31	Eragrostis nigra	5			drainage ditches along national highways (GP)
31	Setaria viridis	39			drainage ditches along national highways (GP)
31	Euphorbia stracheyi	3			drainage ditches along national highways (GP)
31	Artemisia wellbyi	5			drainage ditches along national highways (GP)
31	Pennisetum flaccidum	20			drainage ditches along national highways (GP)
